# Supplementary material
Source: PubMed Central journal article supplement (PMC2657411)
Supplement: 0812074106_0812074106SI.pdf [file 0812074106_0812074106SI.pdf]

# Supporting Information

Omsland, et al. 10.1073/pnas.0812074106

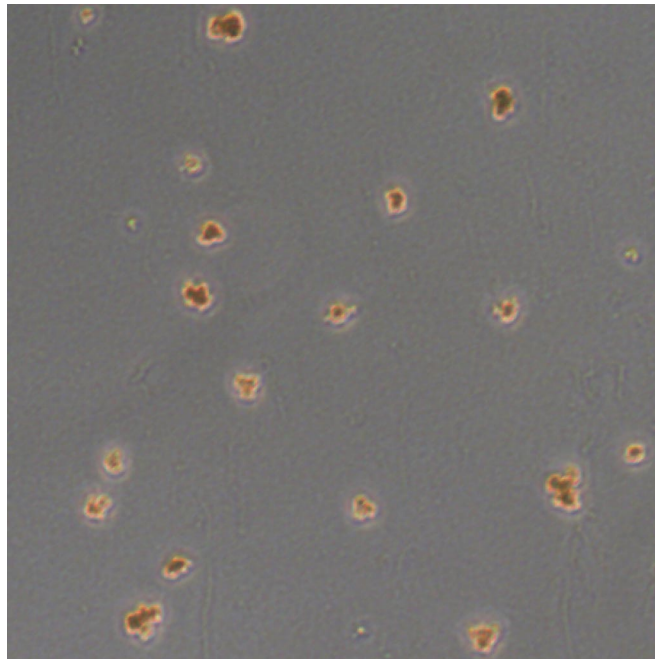

**Fig. S1.** *C. burnetii* forms colonies on solid ACCM medium. *C. burnetii* was spread on a 1% ACCM-agarose base and covered with 0.25% ACCM-agarose. Colonies (0.05–0.1 mm) were present after a 14 days incubation in a 2.5% oxygen environment. A representative image is shown.

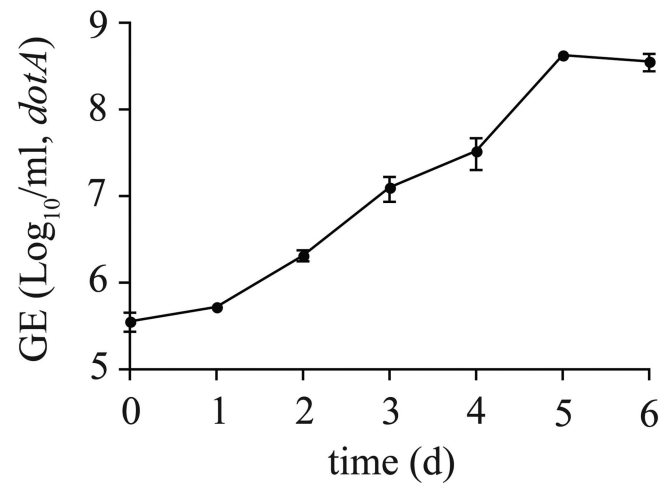

**Fig. S2.** *C. burnetii* SCVs can initiate growth in ACCM. ACCM was inoculated with purified *C. burnetii* SCVs and culture aliquots analyzed for increases in *C. burnetii* GE every 24 h for 6 days by QPCR. Values are mean  $\pm$  SEM ( $n = 3$ ). Cultures exhibited an approximate 3 log increase in GE over 6 days.

Table S1. Ribosomal gene expression of *C. burnetii* during incubation in CCM

| Gene     | Designation | Annotation                                 | Fold difference (CCM/Vero) |
|----------|-------------|--------------------------------------------|----------------------------|
| CBU0221b | —           | Protein Translation Elongation Factor Tu   | −6.10                      |
| CBU0224  | <i>secE</i> | Protein translocase subunit secE           | −6.41                      |
| CBU0225  | <i>nusG</i> | Transcription antitermination protein nusG | −9.20                      |
| CBU0226  | <i>rplK</i> | LSU ribosomal protein L11P                 | −3.78                      |
| CBU0227  | <i>rplA</i> | LSU ribosomal protein L1P                  | −5.28                      |
| CBU0228  | <i>rplJ</i> | LSU ribosomal protein L10P                 | −21.30                     |
| CBU0229  | <i>rplL</i> | LSU ribosomal protein L12P                 | −9.55                      |
| CBU0231  | <i>rpoB</i> | DNA-directed RNA polymerase ( $\beta$ )    | −3.82                      |
| CBU0232  | <i>rpoC</i> | DNA-directed RNA polymerase ( $\beta'$ )   | −3.75                      |
| CBU0233  | <i>rpsL</i> | SSU ribosomal protein S12P                 | −16.09                     |
| CBU0234  | <i>rpsG</i> | SSU ribosomal protein S7P                  | −5.98                      |
| CBU0235  | <i>fusA</i> | Protein translation elongation factor G    | −7.05                      |
| CBU0237  | <i>rpsJ</i> | SSU ribosomal protein S10P                 | −5.04                      |
| CBU0238  | <i>rplC</i> | LSU ribosomal protein L3P                  | −4.70                      |
| CBU0239  | <i>rplD</i> | LSU ribosomal protein L1E/L4P              | −5.69                      |
| CBU0240  | <i>rplW</i> | LSU ribosomal protein L23P                 | −3.58                      |
| CBU0241  | <i>rplB</i> | LSU ribosomal protein L2P                  | −2.02                      |
| CBU0242  | <i>rpsS</i> | SSU ribosomal protein S19P                 | −10.85                     |
| CBU0243  | <i>rplV</i> | LSU ribosomal protein L22P                 | −6.28                      |
| CBU0244  | <i>rpsC</i> | SSU ribosomal protein S3P                  | −4.22                      |
| CBU0245  | <i>rplP</i> | LSU ribosomal protein L16P                 | −6.74                      |
| CBU0246  | <i>rpmC</i> | LSU ribosomal protein L29P                 | −9.79                      |
| CBU0247  | <i>rpsQ</i> | SSU ribosomal protein S17P                 | −3.70                      |
| CBU0248  | <i>rplN</i> | LSU ribosomal protein L14P                 | −6.52                      |
| CBU0249  | <i>rplX</i> | LSU ribosomal protein L24P                 | −6.39                      |
| CBU0250  | <i>rplE</i> | LSU ribosomal protein L5P                  | −7.55                      |
| CBU0251  | <i>rpsN</i> | SSU ribosomal protein S14P                 | −4.64                      |
| CBU0252  | <i>rpsH</i> | SSU ribosomal protein S8P                  | −4.79                      |
| CBU0253  | <i>rplF</i> | LSU ribosomal protein L6P                  | −3.28                      |
| CBU0254  | <i>rplR</i> | LSU ribosomal protein L18P                 | −2.15                      |
| CBU0255  | <i>rpsE</i> | SSU ribosomal protein S5P                  | −2.31                      |
| CBU0256  | —           | LSU ribosomal protein L30P                 | −2.63                      |
| CBU0257  | <i>rplO</i> | LSU ribosomal protein L15P                 | −4.80                      |
| CBU0260  | —           | SSU ribosomal protein S13P                 | −3.21                      |
| CBU0261  | <i>rpsK</i> | SSU ribosomal protein S11P                 | −4.30                      |
| CBU0263  | <i>rpoA</i> | DNA-directed RNA polymerase ( $\alpha$ )   | −6.56                      |
| CBU0264  | <i>rplQ</i> | LSU ribosomal protein L17P                 | −2.43                      |
